# Supplementary material for: Importin β Can Bind Hepatitis B Virus Core Protein and Empty Core-Like Particles and Induce Structural Changes
Source: PubMed Central journal article supplement (PMC4982637; doi:10.1371/journal.ppat.1005802), 2016-08-12
Supplement: ppat.1005802.s001.pdf [file ppat.1005802.s001.pdf]

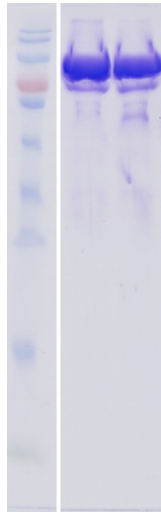

**S1 Figure.** Coomassie stained SDS-PAGE of Imp $\beta$ .
