# Supplementary material for: Importin β Can Bind Hepatitis B Virus Core Protein and Empty Core-Like Particles and Induce Structural Changes
Source: PubMed Central journal article supplement (PMC4982637; doi:10.1371/journal.ppat.1005802), 2016-08-12
Supplement: ppat.1005802.s002.pdf [file ppat.1005802.s002.pdf]

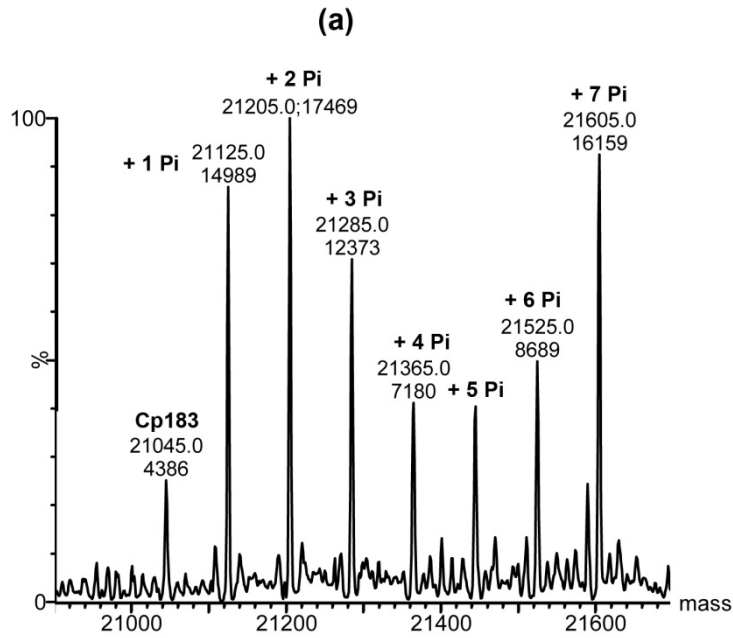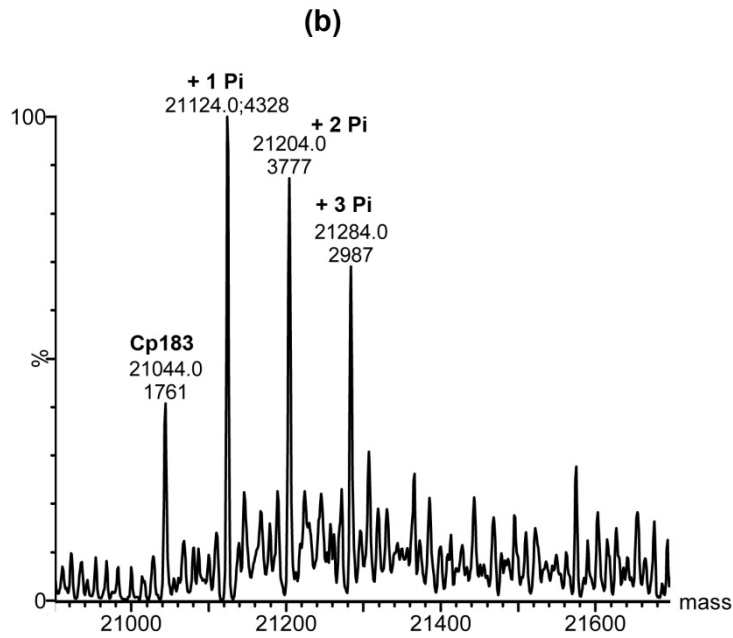

**S2 Figure.** ESI mass spectra phosphorylated Cp183, P-Cp183, prepared by co-expression of Cp183 and SRPK (a) in capsids incorporating *E. Coli* RNA and (b) in empty capsids from purified P-Cp183. The peak labels show assignment, mass, and intensity.
