# Supplementary material for: Importin β Can Bind Hepatitis B Virus Core Protein and Empty Core-Like Particles and Induce Structural Changes
Source: PubMed Central journal article supplement (PMC4982637; doi:10.1371/journal.ppat.1005802), 2016-08-12
Supplement: ppat.1005802.s003.pdf [file ppat.1005802.s003.pdf]

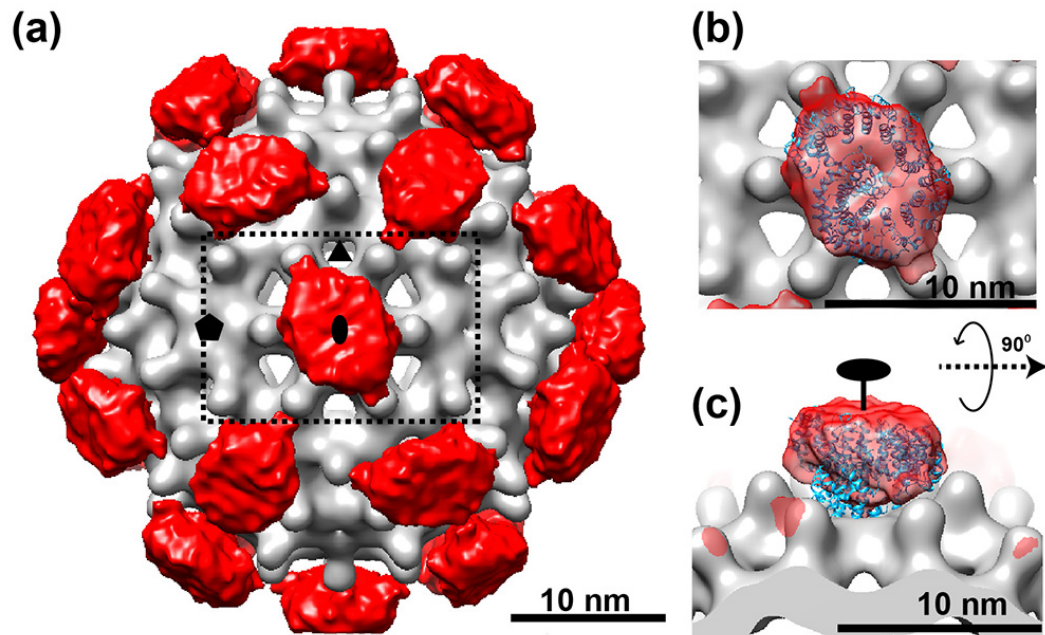

**S3 Figure.** Fitting an atomic model of Imp $\beta$  into cryo-EM density. (a) The difference map of Imp $\beta$  (red) was calculated by subtracting P-Cp183 capsid (Fig. 3d) from P-Cp183-Imp $\beta$  complex (Fig. 3e). Prior to the subtraction, the sizes of these two maps were scaled and the density corresponding to the capsid shell region was normalized. The resulting Imp $\beta$  density (red) was superimposed on the P-Cp183 capsid (gray) and the Imp $\beta$  density was rendered at the contour level that fully covers the atomic structure of Imp $\beta$  (PDB code 3LWW). Oval, triangle, and pentagon indicate locations of twofold, threefold and fivefold axes, respectively. (b) The enlarged view and the (c) 90°-tilted view at the twofold location. As the Imp $\beta$  density is heavily averaged and relatively weak, the fits are presented to allow the reader to gauge the amount of space available.
