# Supplementary material for: Importin β Can Bind Hepatitis B Virus Core Protein and Empty Core-Like Particles and Induce Structural Changes
Source: PubMed Central journal article supplement (PMC4982637; doi:10.1371/journal.ppat.1005802), 2016-08-12
Supplement: ppat.1005802.s004.pdf [file ppat.1005802.s004.pdf]

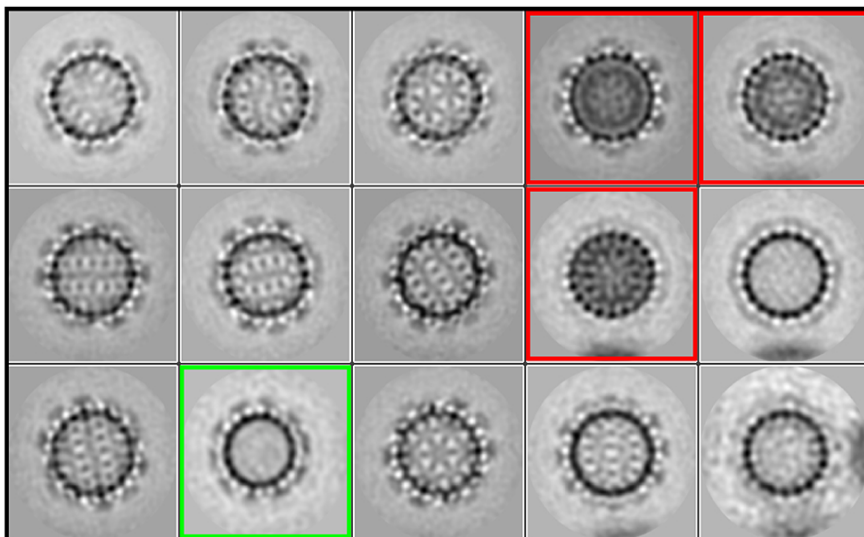

**S4 Figure.** Reference-free 2D classification of Cp183-Imp $\beta$  in 0.15 M ammonium formate. Samples of high Imp $\beta$ :capsid complexes (11  $\mu$ M Cp183 dimer with 18.8  $\mu$ M Imp $\beta$ ) were examined by cryo-EM. Unbiased 2D classification using Relion [84] showed three types: (i) T=4 Cp183-Imp $\beta$  particles, (ii) T=4 Cp183-Imp $\beta$  particles with dark interior, an additional ring-like density (red box), and (iii) T=3 Cp183-Imp $\beta$  particles (green box).
