# Supplementary material for: Importin β Can Bind Hepatitis B Virus Core Protein and Empty Core-Like Particles and Induce Structural Changes
Source: PubMed Central journal article supplement (PMC4982637; doi:10.1371/journal.ppat.1005802), 2016-08-12
Supplement: ppat.1005802.s006.pdf [file ppat.1005802.s006.pdf]

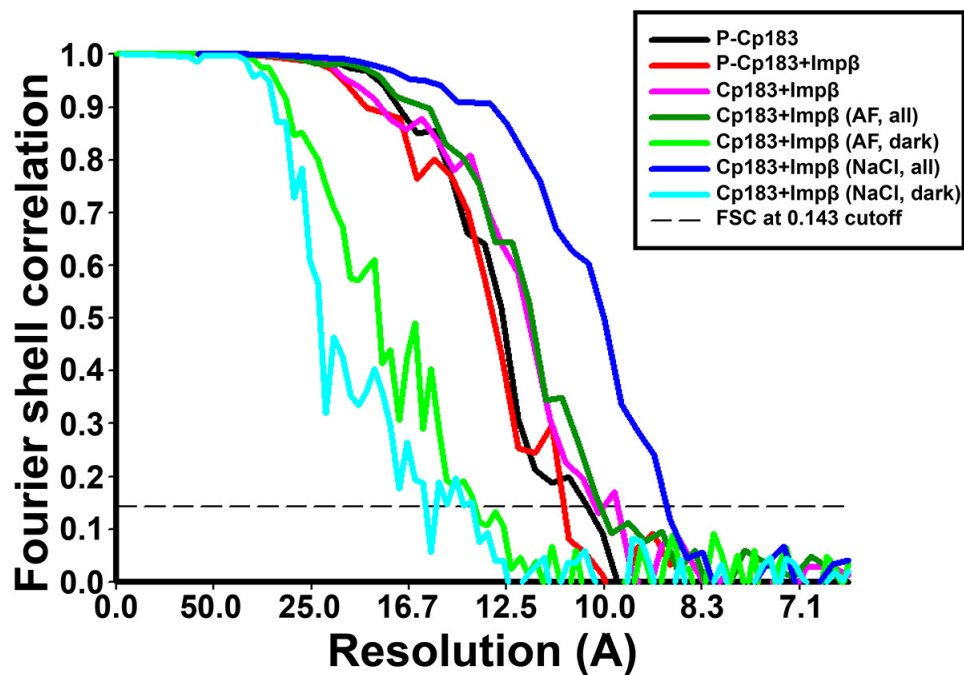

**Figure S6.** Resolution estimation. The black (phosphorylated empty Cp183), green (phosphorylated Cp183 with Imp $\beta$ ) and red (Cp183 with Imp $\beta$ ) curves show the FSC for the 3D reconstructions in Figure 3. The blue curves (thick, all particles; thin, dark particles) show the FSC for the 3D reconstruction in Figure 7. The gray curves (thick, all particles; thin, dark particles) show the FSC for the 3D reconstruction in Figure 8. The 3D reconstruction of the dark particles in NaCl was calculated using gold-standard FSC.
