# Supplementary material for: Importin β Can Bind Hepatitis B Virus Core Protein and Empty Core-Like Particles and Induce Structural Changes
Source: PubMed Central journal article supplement (PMC4982637; doi:10.1371/journal.ppat.1005802), 2016-08-12
Supplement: ppat.1005802.s007.pdf [file ppat.1005802.s007.pdf]

**Table S1. Estimated Imp $\beta$  : capsid ratio determined from size exclusion chromatography.**

| Panel | Sample                                   | Content <sup>1</sup> | Salt <sup>2</sup>                    | imp $\beta$ per capsid <sup>3</sup> |
|-------|------------------------------------------|----------------------|--------------------------------------|-------------------------------------|
|       | 5.3 $\mu$ M Imp $\beta$ 7.9 $\mu$ M Cp   |                      |                                      |                                     |
| 2a    | Cp183                                    | -                    | .15M                                 | 40                                  |
| 2b    | Cp183                                    | -                    | .25M                                 | 4.5                                 |
| 2c    | Cp183                                    | RNA                  | .15M                                 | -1                                  |
| 2d    | P-Cp183                                  | -                    | .15M                                 | 12                                  |
| 2e    | P-Cp183                                  | -                    | .25M                                 | 1.5                                 |
| 2f    | P-Cp183                                  | RNA                  | .15M                                 | 0.5                                 |
| 2g    | Cp149                                    | -                    | .15M                                 | ND*                                 |
|       | 18.8 $\mu$ M Imp $\beta$ , 11 $\mu$ M Cp |                      |                                      |                                     |
| 6a    | Cp183                                    | -                    | .15M NH <sub>4</sub> CO <sub>2</sub> | 26                                  |
| 6b    | Cp183                                    | -                    | .15M                                 | 30                                  |

1. Capsids are empty, in vitro assembled particles or RNA-containing particles from the E. coli expression system

2. Except for panel 6a, samples are buffered by 20mM TrisHCl pH 7.4. Panel 6a has 0.15M NH<sub>4</sub>CO<sub>2</sub> pH 7.

3. Relative protein molar ratios were estimated from Coomassie stained gels using the program imageJ. Errors in background correction will be most evident in cases where the signal is weak.

\* ND – Not Detectable. No detectable imp $\beta$  was observed to co-migrate with Cp149 in either Coomassie staining or silver staining.

As SEC is not an equilibrium technique, Imp $\beta$  can dissociate during the course of the 40 minute-long experiment. In addition, some capsid-Imp $\beta$  complex may precipitate before or during chromatography. These complications result in an underestimate of capsid-bound Imp $\beta$ .
