# Supplementary material for: Importin β Can Bind Hepatitis B Virus Core Protein and Empty Core-Like Particles and Induce Structural Changes
Source: PubMed Central journal article supplement (PMC4982637; doi:10.1371/journal.ppat.1005802), 2016-08-12
Supplement: ppat.1005802.s008.pdf [file ppat.1005802.s008.pdf]

**Table S2. Data collection information**

| Sample                                                 | Salt (M)             | Nominal magnification | Number of CCD images | Number of boxed particles | Number of particles in the final reconstruction | Defocus ( $\mu\text{m}$ ) | Resolution (FSC <sup>4</sup> ) | EMDB accession numbers |
|--------------------------------------------------------|----------------------|-----------------------|----------------------|---------------------------|-------------------------------------------------|---------------------------|--------------------------------|------------------------|
| P-Cp183                                                | 0.15 NaCl            | 40,000x               | 75                   | 22,989                    | 16,093                                          | 0.8 ~ 4.45                | 10.1Å                          | EMD-3266               |
| P-Cp183/<br>Imp $\beta$ <sup>1</sup>                   | 0.15 NaCl            | 40,000x               | 81                   | 7,200                     | 5,760                                           | 1.07 ~ 4.36               | 10.9Å                          | EMD-3267               |
| Cp183/<br>Imp $\beta$ <sup>1</sup>                     | 0.15 NaCl            | 80,000x               | 159                  | 14,195                    | 12,776                                          | 1.40 ~ 4.04               | 10.2Å                          | EMD-3268               |
| Cp183/<br>Imp $\beta$ <sup>2</sup>                     | 0.15 AF <sup>3</sup> | 80,000x               | 129                  | 12,004                    | 8,365                                           | 1.56 ~ 5.46               | 10.1Å                          | EMD-3269               |
| Cp183/<br>Imp $\beta$ <sup>2</sup><br>(dark particles) | 0.15 AF <sup>3</sup> | 80,000x               | 129                  | 4,516                     | 3,154                                           | 1.56 ~ 5.46               | 13.8Å                          | EMD-3270               |
| Cp183/<br>Imp $\beta$ <sup>2</sup>                     | 0.15 NaCl            | 80,000x               | 109                  | 7,225                     | 6,443                                           | 0.91 ~ 4.57               | 8.9Å                           | EMD-3271               |
| Cp183/<br>Imp $\beta$ <sup>2</sup>                     | 0.15 NaCl            | 80,000x               | 109                  | 1,701                     | 1,701                                           | 0.91 ~ 4.57               | 15.9Å                          | EMD-3272               |

1. 7.9  $\mu\text{M}$  Cp183 dimer in capsid form and 5.3  $\mu\text{M}$  Imp $\beta$

2. 11  $\mu\text{M}$  Cp183 dimer in capsid form and 18.8  $\mu\text{M}$  Imp $\beta$

3. AF, ammonium formate

4. Resolution for this sample was calculated using gold-standard Fourier shell correlation and is reported for a correlation at 0.143
